# Supplementary material for: Implementation challenges and real-world impacts of switching pediatric vaccines: A global systematic literature review
Source: PubMed Central journal article supplement — Hum Vaccin Immunother. 2023 Mar 7;19(1):2177459. doi: 10.1080/21645515.2023.2177459 (PMC10026932; doi:10.1080/21645515.2023.2177459), 2023-03-07
Supplement: KHVI_A_2177459_SM4511.pdf [file KHVI_A_2177459_SM4511.pdf]

# Supplementary Materials

## **Implementation Challenges and Real-World Impacts of Switching Pediatric Vaccines: A Global Systematic Literature Review**

Chanthawat Patikorn, Pharm.D., M.Sc., Warittakorn Kategeaw, Pharm.D., Johnna Perdrizet, MPH., Xiuyan Li, MPH., Nathorn Chaiyakunapruk, Pharm.D., Ph.D.

# Contents

**Appendix S1** PRISMA 2020 Checklist

**Appendix S2** Full search strategies

**Appendix S3** Excluded studies with reasons

**Appendix S4** Quality assessment of narrative review articles

**Appendix S5** Quality assessment of cross-sectional study

**Appendix S6** Quality assessment of observational studies

## Appendix S1 PRISMA 2020 Checklist

| Section and Topic             | Item # | Checklist item                                                                                                                                                                                                                                                                                       | Location where item is reported                              |
|-------------------------------|--------|------------------------------------------------------------------------------------------------------------------------------------------------------------------------------------------------------------------------------------------------------------------------------------------------------|--------------------------------------------------------------|
| <b>TITLE</b>                  |        |                                                                                                                                                                                                                                                                                                      |                                                              |
| Title                         | 1      | Identify the report as a systematic review.                                                                                                                                                                                                                                                          | Title                                                        |
| <b>ABSTRACT</b>               |        |                                                                                                                                                                                                                                                                                                      |                                                              |
| Abstract                      | 2      | See the PRISMA 2020 for Abstracts checklist.                                                                                                                                                                                                                                                         | Abstract                                                     |
| <b>INTRODUCTION</b>           |        |                                                                                                                                                                                                                                                                                                      |                                                              |
| Rationale                     | 3      | Describe the rationale for the review in the context of existing knowledge.                                                                                                                                                                                                                          | Background; paragraph 1-3                                    |
| Objectives                    | 4      | Provide an explicit statement of the objective(s) or question(s) the review addresses.                                                                                                                                                                                                               | Background; paragraph 3                                      |
| <b>METHODS</b>                |        |                                                                                                                                                                                                                                                                                                      |                                                              |
| Eligibility criteria          | 5      | Specify the inclusion and exclusion criteria for the review and how studies were grouped for the syntheses.                                                                                                                                                                                          | Materials and methods; eligibility criteria                  |
| Information sources           | 6      | Specify all databases, registers, websites, organisations, reference lists and other sources searched or consulted to identify studies. Specify the date when each source was last searched or consulted.                                                                                            | Materials and methods; search strategy and selection process |
| Search strategy               | 7      | Present the full search strategies for all databases, registers and websites, including any filters and limits used.                                                                                                                                                                                 | Appendix; table S2                                           |
| Selection process             | 8      | Specify the methods used to decide whether a study met the inclusion criteria of the review, including how many reviewers screened each record and each report retrieved, whether they worked independently, and if applicable, details of automation tools used in the process.                     | Materials and methods; search strategy and selection process |
| Data collection process       | 9      | Specify the methods used to collect data from reports, including how many reviewers collected data from each report, whether they worked independently, any processes for obtaining or confirming data from study investigators, and if applicable, details of automation tools used in the process. | Materials and methods; data extraction                       |
| Data items                    | 10a    | List and define all outcomes for which data were sought. Specify whether all results that were compatible with each outcome domain in each study were sought (e.g. for all measures, time points, analyses), and if not, the methods used to decide which results to collect.                        | Materials and methods; data extraction                       |
|                               | 10b    | List and define all other variables for which data were sought (e.g. participant and intervention characteristics, funding sources). Describe any assumptions made about any missing or unclear information.                                                                                         | Not Applicable                                               |
| Study risk of bias assessment | 11     | Specify the methods used to assess risk of bias in the included studies, including details of the tool(s) used, how many reviewers assessed each study and whether they worked independently, and if applicable, details of automation tools used in the process.                                    | Materials and methods; quality assessment                    |
| Effect measures               | 12     | Specify for each outcome the effect measure(s) (e.g. risk ratio, mean difference) used in the synthesis or presentation of results.                                                                                                                                                                  | Not Applicable                                               |
| Synthesis methods             | 13a    | Describe the processes used to decide which studies were eligible for each synthesis (e.g. tabulating the study intervention characteristics and comparing against the planned groups for each synthesis (item #5)).                                                                                 | Materials and methods; search strategy and selection process |
|                               | 13b    | Describe any methods required to prepare the data for presentation or synthesis, such as handling of missing summary statistics, or data conversions.                                                                                                                                                | Not Applicable                                               |

| Section and Topic             | Item # | Checklist item                                                                                                                                                                                                                                                                       | Location where item is reported       |
|-------------------------------|--------|--------------------------------------------------------------------------------------------------------------------------------------------------------------------------------------------------------------------------------------------------------------------------------------|---------------------------------------|
|                               | 13c    | Describe any methods used to tabulate or visually display results of individual studies and syntheses.                                                                                                                                                                               | Materials and methods; data synthesis |
|                               | 13d    | Describe any methods used to synthesize results and provide a rationale for the choice(s). If meta-analysis was performed, describe the model(s), method(s) to identify the presence and extent of statistical heterogeneity, and software package(s) used.                          | Materials and methods; data synthesis |
|                               | 13e    | Describe any methods used to explore possible causes of heterogeneity among study results (e.g. subgroup analysis, meta-regression).                                                                                                                                                 | Materials and methods; data synthesis |
|                               | 13f    | Describe any sensitivity analyses conducted to assess robustness of the synthesized results.                                                                                                                                                                                         | Not Applicable                        |
| Reporting bias assessment     | 14     | Describe any methods used to assess risk of bias due to missing results in a synthesis (arising from reporting biases).                                                                                                                                                              | Not Applicable                        |
| Certainty assessment          | 15     | Describe any methods used to assess certainty (or confidence) in the body of evidence for an outcome.                                                                                                                                                                                | Not Applicable                        |
| <b>RESULTS</b>                |        |                                                                                                                                                                                                                                                                                      |                                       |
| Study selection               | 16a    | Describe the results of the search and selection process, from the number of records identified in the search to the number of studies included in the review, ideally using a flow diagram.                                                                                         | Results, Figure 1                     |
|                               | 16b    | Cite studies that might appear to meet the inclusion criteria, but which were excluded, and explain why they were excluded.                                                                                                                                                          | Appendix S3                           |
| Study characteristics         | 17     | Cite each included study and present its characteristics.                                                                                                                                                                                                                            | Table 1                               |
| Risk of bias in studies       | 18     | Present assessments of risk of bias for each included study.                                                                                                                                                                                                                         | Appendix; table S4-6                  |
| Results of individual studies | 19     | For all outcomes, present, for each study: (a) summary statistics for each group (where appropriate) and (b) an effect estimate and its precision (e.g. confidence/credible interval), ideally using structured tables or plots.                                                     | Table 1                               |
| Results of syntheses          | 20a    | For each synthesis, briefly summarise the characteristics and risk of bias among contributing studies.                                                                                                                                                                               | Results, Table 1, Appendix table S4-6 |
|                               | 20b    | Present results of all statistical syntheses conducted. If meta-analysis was done, present for each the summary estimate and its precision (e.g. confidence/credible interval) and measures of statistical heterogeneity. If comparing groups, describe the direction of the effect. | Not Applicable                        |
|                               | 20c    | Present results of all investigations of possible causes of heterogeneity among study results.                                                                                                                                                                                       | Not Applicable                        |
|                               | 20d    | Present results of all sensitivity analyses conducted to assess the robustness of the synthesized results.                                                                                                                                                                           | Not Applicable                        |
| Reporting biases              | 21     | Present assessments of risk of bias due to missing results (arising from reporting biases) for each synthesis assessed.                                                                                                                                                              | Not Applicable                        |
| Certainty of evidence         | 22     | Present assessments of certainty (or confidence) in the body of evidence for each outcome assessed.                                                                                                                                                                                  | Not Applicable                        |
| <b>DISCUSSION</b>             |        |                                                                                                                                                                                                                                                                                      |                                       |
| Discussion                    | 23a    | Provide a general interpretation of the results in the context of other evidence.                                                                                                                                                                                                    | Discussion; paragraph 1-8             |
|                               | 23b    | Discuss any limitations of the evidence included in the review.                                                                                                                                                                                                                      | Discussion; limitation                |
|                               | 23c    | Discuss any limitations of the review processes used.                                                                                                                                                                                                                                | Discussion; limitation                |
|                               | 23d    | Discuss implications of the results for practice, policy, and future research.                                                                                                                                                                                                       | Discussion; limitation                |

| Section and Topic                              | Item # | Checklist item                                                                                                                                                                                                                             | Location where item is reported                |
|------------------------------------------------|--------|--------------------------------------------------------------------------------------------------------------------------------------------------------------------------------------------------------------------------------------------|------------------------------------------------|
| <b>OTHER INFORMATION</b>                       |        |                                                                                                                                                                                                                                            |                                                |
| Registration and protocol                      | 24a    | Provide registration information for the review, including register name and registration number, or state that the review was not registered.                                                                                             | Materials and methods; paragraph 3             |
|                                                | 24b    | Indicate where the review protocol can be accessed, or state that a protocol was not prepared.                                                                                                                                             | Materials and methods; paragraph 3             |
|                                                | 24c    | Describe and explain any amendments to information provided at registration or in the protocol.                                                                                                                                            | Not Applicable                                 |
| Support                                        | 25     | Describe sources of financial or non-financial support for the review, and the role of the funders or sponsors in the review.                                                                                                              | Disclaimers; funding                           |
| Competing interests                            | 26     | Declare any competing interests of review authors.                                                                                                                                                                                         | Disclaimers; declaration of interest statement |
| Availability of data, code and other materials | 27     | Report which of the following are publicly available and where they can be found: template data collection forms; data extracted from included studies; data used for all analyses; analytic code; any other materials used in the review. | Not Applicable                                 |

From: Page MJ, McKenzie JE, Bossuyt PM, Boutron I, Hoffmann TC, Mulrow CD, et al. The PRISMA 2020 statement: an updated guideline for reporting systematic reviews. *BMJ* 2021;372:n71. doi: 10.1136/bmj.n71  
For more information, visit: <http://www.prisma-statement.org/> ¶

## Appendix S2 Full search strategies

From database inception to April 30, 2022

| Database     | Search term                                                                                                                                                    | Results      |
|--------------|----------------------------------------------------------------------------------------------------------------------------------------------------------------|--------------|
| PubMed       | (Child* OR Infant* OR Pediatric* OR Paediatric*) AND (Vaccines[MeSH] OR Vaccin*[tiab] OR Immunis*[tiab] OR Immuniz*[tiab] OR inoculat*) AND Switch*[tiab]      | 705          |
| EMBASE       | (child* OR infant* OR pediatric* OR paediatric*) AND (vaccin*:ti,ab OR immunis*:ti,ab OR immuniz*:ti,ab OR inoculat*:ti,ab) AND switch*:ti,ab AND [embase]/lim | 891          |
| CENTRAL      | (child* OR infant* OR pediatric* OR paediatric*) AND (vaccin* OR immunis* OR immuniz* OR inoculat) AND switch* in All Text                                     | 71           |
| LILACS       | Vaccine AND Switch                                                                                                                                             | 7            |
| <b>Total</b> |                                                                                                                                                                | <b>1,674</b> |

Additional search for grey literature

| Search date | Source                                                                                                                    | Keywords                             | Hits                    | Included reports |
|-------------|---------------------------------------------------------------------------------------------------------------------------|--------------------------------------|-------------------------|------------------|
| 12/21/2022  | OpenGrey                                                                                                                  | (Vaccine OR Immunization) AND Switch | 1                       | 0                |
| 12/21/2022  | EBSCO Open Dissertations                                                                                                  | (Vaccine OR Immunization) AND Switch | 43                      | 0                |
| 12/21/2022  | World Health Organization (WHO) ( <a href="http://www.who.int">www.who.int</a> )                                          | Switch                               | 55                      | 0                |
| 12/21/2022  | WHO European Region (EURO) ( <a href="http://www.who.int/europe/">www.who.int/europe/</a> )                               | Switch                               | 19                      | 1                |
| 12/21/2022  | WHO Eastern Mediterranean Region (EMRO) ( <a href="http://www.emro.who.int/">www.emro.who.int/</a> )                      | Switch                               | Database is not working | 0                |
| 12/21/2022  | WHO Western Pacific Region (WPRO) ( <a href="https://www.who.int/westernpacifi">https://www.who.int/westernpacifi</a> )   | Switch                               | 34                      | 0                |
| 12/22/2022  | WHO South-East Asia Region (SEAR) ( <a href="https://www.who.int/southeastasia/">https://www.who.int/southeastasia/</a> ) | Switch                               | 39                      | 0                |

|            |                                                                                                              |                                   |     |   |
|------------|--------------------------------------------------------------------------------------------------------------|-----------------------------------|-----|---|
| 12/22/2022 | WHO Pan American Health Organization (PAHO)<br><a href="https://www.paho.org/en">https://www.paho.org/en</a> | vaccin AND "switch" AND pediatric | 540 | 1 |
| 12/22/2022 | WHO African Region (AFRO)                                                                                    | vaccin AND "switch" AND pediatric | 460 | 2 |
| Total      |                                                                                                              |                                   |     | 3 |

### Appendix S3 Excluded studies with reasons

| First Author                                     | Year Published | Title                                                                                                                                                                                                          |
|--------------------------------------------------|----------------|----------------------------------------------------------------------------------------------------------------------------------------------------------------------------------------------------------------|
| <b>No challenges of vaccine switch mentioned</b> |                |                                                                                                                                                                                                                |
| Abba B.                                          | 2018           | Mobilizing political support proved critical to a successful switch from tOPV to bOPV in Kano, Nigeria 2016                                                                                                    |
| Abbott S.                                        | 2022           | Reassessing the evidence for universal school-age BCG vaccination in England and Wales: Re-evaluating and updating a modelling study                                                                           |
| Adetifa I. M.                                    | 2012           | Pre-vaccination nasopharyngeal pneumococcal carriage in a Nigerian population: epidemiology and population biology                                                                                             |
| Ahmad M.                                         | 2016           | Cross-sectional Serologic Assessment of Immunity to Poliovirus in Differential Risk Areas of India: India Seroprevalence Survey - 2014                                                                         |
| Ahmad M.                                         | 2021           | Poliomyelitis seroprevalence in high risk populations of India before the trivalent to bivalent oral poliovirus vaccine switch in 2016                                                                         |
| Aljunid S. M.                                    | 2022           | Economic impact of switching from partially combined vaccine "Pentaxim® and hepatitis B" to fully combined vaccine "Hexaxim®" in the Malaysian National Immunization Program                                   |
| Alleman M. M.                                    | 2020           | Update on Vaccine-Derived Poliovirus Outbreaks - Worldwide, July 2019-February 2020                                                                                                                            |
| Alrabiaah A. A.                                  | 2012           | Outbreak of Bacille Calmette-Guérin-related lymphadenitis in Saudi children at a university hospital after a change in the strain of vaccine                                                                   |
| Altamirano J.                                    | 2018           | OPV Vaccination and Shedding Patterns in Mexican and US Children                                                                                                                                               |
| Alvarez A. M. R.                                 | 2017           | The evolution of Vaccination Week in the Americas                                                                                                                                                              |
| Amiche A.                                        | 2021           | Cost Utility of Switching From Trivalent to Quadrivalent Influenza Vaccine in Turkey                                                                                                                           |
| Andrade A. L.                                    | 2010           | Non-typeable Streptococcus pneumoniae carriage isolates genetically similar to invasive and carriage isolates expressing capsular type 14 in Brazilian infants                                                 |
| Angoulvant F.                                    | 2014           | Early impact of 13-valent pneumococcal conjugate vaccine on community-acquired pneumonia in children                                                                                                           |
| Ansaldi F.                                       | 2020           | Estimating the clinical and economic impact of switching from the 13-valent pneumococcal conjugate vaccine (PCV13) to the 10-valent pneumococcal conjugate vaccine (PCV10) in Italy                            |
| Ansaldi F.                                       | 2011           | Increasing incidence of Streptococcus pneumoniae serotype 19A and emergence of two vaccine escape recombinant ST695 strains in Liguria, Italy, 7 years after implementation of the 7-valent conjugated vaccine |
| Asai N.                                          | 2019           | A severe case of Streptococcal pyogenes empyema following influenza A infection                                                                                                                                |



| <b>First Author</b> | <b>Year Published</b> | <b>Title</b>                                                                                                                                                                                     |
|---------------------|-----------------------|--------------------------------------------------------------------------------------------------------------------------------------------------------------------------------------------------|
| Asogwa O. A.        | 2022                  | Impact of 7-valent versus 10-valent pneumococcal conjugate vaccines on primary care consultations across various age groups in the Netherlands, 5 years after the switch: A time-series analysis |
| Assi T. M.          | 2011                  | Impact of changing the measles vaccine vial size on Niger's vaccine supply chain: a computational model                                                                                          |
| Avigan D.           | 2001                  | Vaccination against infectious disease following hematopoietic stem cell transplantation                                                                                                         |
| Avila-Agüero M. L.  | 2022                  | Epidemiology of pertussis in Costa Rica and the impact of vaccination: A 58-year experience (1961-2018)                                                                                          |
| Ayouni K.           | 2020                  | Hepatitis a virus infection in Central-West Tunisia: An age structured model of transmission and vaccination impact                                                                              |
| Bahl S.             | 2016                  | Fractional-Dose Inactivated Poliovirus Vaccine Immunization Campaign - Telangana State, India, June 2016                                                                                         |
| Balmer P.           | 2002                  | Impact of meningococcal C conjugate vaccine in the UK                                                                                                                                            |
| Barlan I. B.        | 2005                  | Role of bacillus Calmette-Guérin as an immunomodulator for the prevention and treatment of allergy and asthma                                                                                    |
| Bart M. J.          | 2014                  | Global population structure and evolution of Bordetella pertussis and their relationship with vaccination                                                                                        |
| Bauch C. T.         | 2007                  | Cost-utility of universal hepatitis A vaccination in Canada                                                                                                                                      |
| Baxendale H. E.     | 2008                  | Natural human antibodies to pneumococcus have distinctive molecular characteristics and protect against pneumococcal disease                                                                     |
| Beall B.            | 2018                  | A population-based descriptive atlas of invasive pneumococcal strains recovered within the U.S. During 2015-2016                                                                                 |
| Becker N. G.        | 1996                  | Simultaneous control of measles and rubella by multidose vaccination schedules                                                                                                                   |
| Bellier L.          | 2021                  | Cost-effectiveness analysis of switching from a trivalent to a quadrivalent inactivated influenza vaccine in the Peruvian immunisation programme                                                 |
| Bencina G.          | 2022                  | Recommendations and Health Technology Assessment (HTA) landscape evaluation for pediatric pneumococcal conjugate vaccines (PCV) in Europe: a systematic literature review                        |
| Berbers G. A. M.    | 2009                  | Improving pertussis vaccination                                                                                                                                                                  |
| Bianculli P. M.     | 2022                  | Switching from trivalent to quadrivalent inactivated influenza vaccines in Uruguay: a cost-effectiveness analysis                                                                                |
| Bijlsma M. W.       | 2014                  | Epidemiology of invasive meningococcal disease in the Netherlands, 1960-2012: An analysis of national surveillance data                                                                          |
| Boccalini S.        | 2017                  | Hospitalizations for pneumonia, invasive diseases and otitis in Tuscany (Italy), 2002-2014: Which was the impact of universal pneumococcal pediatric vaccination?                                |

| <b>First Author</b>  | <b>Year Published</b> | <b>Title</b>                                                                                                                                                              |
|----------------------|-----------------------|---------------------------------------------------------------------------------------------------------------------------------------------------------------------------|
| Borkowsky W.         | 1987                  | Antibody responses to bacterial toxoids in children infected with human immunodeficiency virus                                                                            |
| Bosch A.             | 2016                  | Nasopharyngeal carriage of Streptococcus pneumoniae and other bacteria in the 7th year after implementation of the pneumococcal conjugate vaccine in the Netherlands      |
| Brickley E. B.       | 2017                  | Vaccine-induced mucosal immunity from ipv-bopv and ipv-only immunization schedules: Analysis of an open-label, randomized controlled trial in Chilean infants             |
| Brisson M.           | 2016                  | Health and Economic Impact of Switching from a 4-Valent to a 9-Valent HPV Vaccination Program in the United States                                                        |
| Brueggemann A. B.    | 2013                  | Population genetic structure of Streptococcus pneumoniae in Kilifi, Kenya, prior to the introduction of pneumococcal conjugate vaccine                                    |
| Brueggemann A. B.    | 2007                  | Vaccine escape recombinants emerge after pneumococcal vaccination in the United States                                                                                    |
| Brugger S. D.        | 2010                  | Multiple colonization with S. pneumoniae before and after introduction of the seven-valent conjugated pneumococcal polysaccharide vaccine                                 |
| Byington C. L.       | 2010                  | Molecular epidemiology of pediatric pneumococcal empyema from 2001 to 2007 in Utah                                                                                        |
| Callaway E.          | 2013                  | Vaccine switch urged for polio endgame                                                                                                                                    |
| Capeding M. R.       | 2014                  | Interchangeability of Quinvaxem during primary vaccination schedules: results from a phase IV, single-blind, randomized, controlled, single-center, non-inferiority study |
| Capra G.             | 2017                  | Potential impact of a nonavalent HPV vaccine on HPV related low-and high-grade cervical intraepithelial lesions: A referral hospital-based study in Sicily                |
| Castañeda-Orjuela C. | 2018                  | How cost effective is switching universal vaccination from PCV10 to PCV13? A case study from a developing country                                                         |
| Cata-Preta B. O.     | 2021                  | Patterns in Wealth-related Inequalities in 86 Low- and Middle-Income Countries: Global Evidence on the Emergence of Vaccine Hesitancy                                     |
| Chaguza C.           | 2017                  | Population genetic structure, antibiotic resistance, capsule switching and evolution of invasive pneumococci before conjugate vaccination in Malawi                       |
| Chard A. N.          | 2021                  | Estimation of oral poliovirus vaccine effectiveness in Afghanistan, 2010-2020                                                                                             |
| Chen W.              | 2004                  | No evidence for links between autism, MMR and measles virus                                                                                                               |
| Chen Z.              | 2017                  | Immune persistence after pertussis vaccination                                                                                                                            |
| Chiba N.             | 2011                  | Current status of invasive pneumococcal diseases and the preventive pneumococcal vaccines in Japan                                                                        |
| Choi Y. H.           | 2012                  | Mathematical modelling long-term effects of replacing prevnar7 with prevnar13 on invasive pneumococcal diseases in england and wales                                      |

| <b>First Author</b>                | <b>Year Published</b> | <b>Title</b>                                                                                                                                                                                                                                                                                     |
|------------------------------------|-----------------------|--------------------------------------------------------------------------------------------------------------------------------------------------------------------------------------------------------------------------------------------------------------------------------------------------|
| Chrapkowska C.                     | 2020                  | Validation of the new Swedish vaccination register - Accuracy and completeness of register data                                                                                                                                                                                                  |
| Christensen K. K.                  | 1985                  | Immune response to pneumococcal vaccine in mothers to infants with group B streptococcal septicemia: Evidence for a divergent IgG/IgM ratio                                                                                                                                                      |
| Ciapponi A.                        | 2019                  | Sequential inactivated (IPV) and live oral (OPV) poliovirus vaccines for preventing poliomyelitis                                                                                                                                                                                                |
| Claes C.                           | 2009                  | Cost-effectiveness of switching strategies from A 7-valent to A 13-valent pneumococcal conjugate vaccine                                                                                                                                                                                         |
| Clutterbuck E. A.                  | 2008                  | Serotype-specific and age-dependent generation of pneumococcal polysaccharide-specific memory B-cell and antibody responses to immunization with a pneumococcal conjugate vaccine                                                                                                                |
| Cremers A. J.                      | 2015                  | The post-vaccine microevolution of invasive <i>Streptococcus pneumoniae</i>                                                                                                                                                                                                                      |
| Crépey P.                          | 2020                  | From trivalent to quadrivalent influenza vaccines: Public health and economic burden for different immunization strategies in Spain                                                                                                                                                              |
| Crépey P.                          | 2020                  | Impact of quadrivalent influenza vaccines in Brazil: a cost-effectiveness analysis using an influenza transmission model                                                                                                                                                                         |
| Croucher N. J.                     | 2013                  | Population genomics of post-vaccine changes in pneumococcal epidemiology                                                                                                                                                                                                                         |
| Croucher N. J.                     | 2015                  | Selective and genetic constraints on pneumococcal serotype switching                                                                                                                                                                                                                             |
| Cuba IPV Study Collaborative Group | 2007                  | Randomized, placebo-controlled trial of inactivated poliovirus vaccine in Cuba                                                                                                                                                                                                                   |
| Dagan R.                           | 2011                  | Pneumococcal conjugate vaccines as a probe for better understanding pneumococcal respiratory infections                                                                                                                                                                                          |
| Davies E. G.                       | 2004                  | Pneumococcal vaccines for sickle cell disease                                                                                                                                                                                                                                                    |
| Davis B.                           | 2022                  | A method for estimating the impact of new vaccine technologies on vaccination coverage rates                                                                                                                                                                                                     |
| De Graeve D.                       | 2004                  | Economic aspects of pneumococcal pneumonia: A review of the literature                                                                                                                                                                                                                           |
| de Los Santos A. M.                | 2020                  | Can two different pneumococcal conjugate vaccines be used to complete the infant vaccination series? A randomized trial exploring interchangeability of the 13-valent pneumococcal conjugate vaccine and the pneumococcal non-typeable <i>Haemophilus influenzae</i> protein D-conjugate vaccine |
| de Onis M.                         | 2013                  | Update on the implementation of the WHO child growth standards                                                                                                                                                                                                                                   |
| De Wals P.                         | 2017                  | Cost-effectiveness Comparison of Monovalent C Versus Quadrivalent ACWY Meningococcal Conjugate Vaccination in Canada                                                                                                                                                                             |
| DeAngelis H.                       | 2016                  | Epidemiological and Economic Effects of Priming With the Whole-Cell <i>Bordetella pertussis</i> Vaccine                                                                                                                                                                                          |
| Debellut F.                        | 2020                  | Introduction of rotavirus vaccination in Palestine: An evaluation of the costs, impact, and cost-effectiveness of ROTARIX and ROTAVAC                                                                                                                                                            |

| <b>First Author</b> | <b>Year Published</b> | <b>Title</b>                                                                                                                                                                                    |
|---------------------|-----------------------|-------------------------------------------------------------------------------------------------------------------------------------------------------------------------------------------------|
| Degiuseppe J. I.    | 2020                  | Genotype distribution of Group A rotavirus in children before and after massive vaccination in Latin America and the Caribbean: Systematic review                                               |
| Delea T. E.         | 2017                  | Cost-effectiveness of alternate strategies for childhood immunization against meningococcal disease with monovalent and quadrivalent conjugate vaccines in Canada                               |
| Deml M. J.          | 2022                  | Trust, affect, and choice in parents' vaccination decision-making and health-care provider selection in Switzerland                                                                             |
| Dempsey A. F.       | 2011                  | Alternative vaccination schedule preferences among parents of young children                                                                                                                    |
| Deng X.             | 2015                  | Genetic Analysis of Invasive Pneumococcal Isolates from Children in Ontario, Canada, 2007-2012                                                                                                  |
| Desmet S.           | 2021                  | Dynamic changes in paediatric invasive pneumococcal disease after sequential switches of conjugate vaccine in Belgium: a national retrospective observational study                             |
| Desmet S.           | 2021                  | In-depth analysis of pneumococcal serotypes in Belgian children (2015-2018): Diversity, invasive disease potential, and antimicrobial susceptibility in carriage and disease                    |
| Desmet S.           | 2018                  | Switch in a childhood pneumococcal vaccination programme from PCV13 to PCV10: a defensible approach?                                                                                            |
| Desmet S.           | 2018                  | Switch in childhood pneumococcal vaccine in Belgium                                                                                                                                             |
| Devine A.           | 2017                  | Strategies for the prevention of perinatal hepatitis B transmission in a marginalized population on the Thailand-Myanmar border: a cost-effectiveness analysis                                  |
| Di Pietro G. M.     | 2022                  | Meningococcal Disease in Pediatric Age: A Focus on Epidemiology and Prevention                                                                                                                  |
| Diks A. M.          | 2022                  | Age and Primary Vaccination Background Influence the Plasma Cell Response to Pertussis Booster Vaccination                                                                                      |
| Dintzis R. Z.       | 1992                  | Rational design of conjugate vaccines                                                                                                                                                           |
| Dobay O.            | 2010                  | Genotypic and phenotypic characterisation of invasive Streptococcus pneumoniae isolates from Hungary, and coverage of the conjugate vaccines                                                    |
| Dobay O.            | 2008                  | The effect of the 7-valent conjugate vaccine (PCV7) on the incidence of pneumococcal infections world-wide                                                                                      |
| Dore D. D.          | 2012                  | Vaccine discontinuation and switching following regulatory interventions in response to rotavirus vaccine contamination with porcine circovirus DNA fragments                                   |
| Dorji T.            | 2015                  | Introduction of a National HPV vaccination program into Bhutan                                                                                                                                  |
| Drolet M.           | 2021                  | Optimal human papillomavirus vaccination strategies to prevent cervical cancer in low-income and middle-income countries in the context of limited resources: a mathematical modelling analysis |

| First Author           | Year Published | Title                                                                                                                                                                                                      |
|------------------------|----------------|------------------------------------------------------------------------------------------------------------------------------------------------------------------------------------------------------------|
| Drolet M.              | 2013           | Vaccinating Girls and Boys with Different Human Papillomavirus Vaccines: Can It Optimise Population-Level Effectiveness?                                                                                   |
| Duintjer Tebbens R. J. | 2016           | Implementation of coordinated global serotype 2 oral poliovirus vaccine cessation: risks of inadvertent trivalent oral poliovirus vaccine use                                                              |
| Durham D. P.           | 2016           | National- and state-level impact and cost-effectiveness of nonavalent HPV vaccination in the United States                                                                                                 |
| Eisen S.               | 2016           | B-cell development and pneumococcal immunity in vertically acquired HIV infection                                                                                                                          |
| Elas M.                | 2021           | Disproportionality analysis of reported drug adverse events to assess a potential safety signal for pentavalent vaccine in 2019 in El Salvador                                                             |
| Elberse K. E.          | 2012           | Changes in the composition of the pneumococcal population and in IPD incidence in The Netherlands after the implementation of the 7-valent pneumococcal conjugate vaccine                                  |
| Elberse K. E.          | 2016           | Pneumococcal population in the era of vaccination: changes in composition and the relation to clinical outcomes                                                                                            |
| Enkel S. L.            | 2018           | 'Hesitant compliers': Qualitative analysis of concerned fully-vaccinating parents                                                                                                                          |
| Estivariz C. F.        | 2022           | Review of use of inactivated poliovirus vaccine in campaigns to control type 2 circulating vaccine derived poliovirus (cVDPV) outbreaks                                                                    |
| Everett D. B.          | 2012           | Genetic characterisation of Malawian pneumococci prior to the roll-out of the PCV13 vaccine using a high-throughput whole genome sequencing approach                                                       |
| Falleiros-Arlant L. H. | 2014           | The challenge of changing the inactivated poliomyelitis vaccine in Latin America: declaration of the Latin American Society of Pediatric Infectious Diseases (SLIPE)                                       |
| Fathima P.             | 2019           | Effectiveness of rotavirus vaccines in an Australian population: A case-control study                                                                                                                      |
| Fatiregun A.           | 2020           | Field investigation and response to a vaccine-derived poliovirus pre-topv switch in Southwest Nigeria, October 2015                                                                                        |
| Fedoseenko M. V.       | 2021           | Prevalence of Allergic Diseases in Children Vaccinated against Tuberculosis and Hepatitis B in the Early Neonatal Period: Literature Review                                                                |
| Finn A.                | 2000           | Time to switch from whole cell to acellular pertussis vaccines?                                                                                                                                            |
| Florindo C.            | 2014           | Epidemiological surveillance of colonising group B Streptococcus epidemiology in the Lisbon and Tagus Valley regions, Portugal (2005 to 2012): emergence of a new epidemic type IV/clonal complex 17 clone |
| Fortanier A. C.        | 2018           | Outpatient antibiotic use in Dutch infants after 10-valent pneumococcal vaccine introduction: A time-series analysis                                                                                       |
| Galil K.               | 1999           | Reemergence of invasive Haemophilus influenzae type b disease in a well-vaccinated population in remote Alaska                                                                                             |

| <b>First Author</b>     | <b>Year Published</b> | <b>Title</b>                                                                                                                                                       |
|-------------------------|-----------------------|--------------------------------------------------------------------------------------------------------------------------------------------------------------------|
| Gamage D.               | 2015                  | Achieving high seroprevalence against polioviruses in Sri Lanka—Results from a serological survey, 2014                                                            |
| García A.               | 2016                  | Cost-effectiveness analysis of quadrivalent influenza vaccine in Spain                                                                                             |
| Geier D. A.             | 2002                  | Clinical implications of endotoxin concentrations in vaccines                                                                                                      |
| Gertz Jr R. E.          | 2003                  | Clonal distribution of invasive pneumococcal isolates from children and selected adults in the United States prior to 7-valent conjugate vaccine introduction      |
| Gherardi G.             | 2009                  | Population structure of invasive Streptococcus pneumoniae isolates in Italy prior to the implementation of the 7-valent conjugate vaccine (1999-2003)              |
| Glover M. T.            | 1992                  | A double-blind controlled trial of hyposensitization to Dermatophagoides pteronyssinus in children with atopic eczema                                              |
| Goldhaber-Fiebert J. D. | 2008                  | Cost-effectiveness of cervical cancer screening with human papillomavirus DNA testing and HPV-16,18 vaccination                                                    |
| Gopal K.                | 2010                  | Epidemiology and management of hepatitis B in women of childbearing age at an Urban medical center                                                                 |
| Grassly N. C.           | 2006                  | New strategies for the elimination of polio from India                                                                                                             |
| Greene S. A.            | 2019                  | Progress Toward Polio Eradication - Worldwide, January 2017-March 2019                                                                                             |
| Griffin M. R.           | 2014                  | Declines in pneumonia hospitalizations of children aged <2 years associated with the use of pneumococcal conjugate vaccines - Tennessee, 1998-2012                 |
| Griffiths U. K.         | 2009                  | Incremental system costs of introducing combined DTwP-hepatitis B-Hib vaccine into national immunization services in Ethiopia                                      |
| Griffiths U. K.         | 2006                  | The cost-effectiveness of alternative polio immunization policies in South Africa                                                                                  |
| Grover M.               | 2015                  | India's last battle in the war against polio                                                                                                                       |
| Guiso N.                | 2017                  | Whooping cough surveillance in France in pediatric private practice in 2006-2015                                                                                   |
| Hanage W. P.            | 2011                  | Carried pneumococci in Massachusetts children: The contribution of clonal expansion and serotype switching                                                         |
| Hanke C. R.             | 2015                  | Impact of PCV7 on nasopharyngeal density, serotype distribution and antibiotic resistance of pneumococcal strains isolated from peruvian children                  |
| Harrison L. H.          | 2010                  | Population structure and capsular switching of invasive neisseria meningitidis isolates in the pre-meningococcal conjugate vaccine Era - United States, 2000-2005  |
| Hawken S.               | 2012                  | Underestimating the safety benefits of a new vaccine: the impact of acellular pertussis vaccine versus whole-cell pertussis vaccine on health services utilization |
| Hay C. R.               | 2006                  | The epidemiology of factor VIII inhibitors                                                                                                                         |
| Heininger U.            | 2016                  | Comparative Epidemiologic Characteristics of Pertussis in 10 Central and Eastern European Countries, 2000-2013                                                     |
| Hekimoğlu C. H.         | 2018                  | Seroprevalence and social determinants of varicella in Turkey                                                                                                      |

| First Author    | Year Published | Title                                                                                                                                                                                                           |
|-----------------|----------------|-----------------------------------------------------------------------------------------------------------------------------------------------------------------------------------------------------------------|
| Herzog C.       | 2015           | Changing from whole-cell to acellular pertussis vaccines would trade superior tolerability for inferior protection                                                                                              |
| Hollinger F. B. | 1987           | Hepatitis B vaccines--to switch or not to switch                                                                                                                                                                |
| Hougs L.        | 1999           | The first dose of a Haemophilus influenzae type b conjugate vaccine reactivates memory b cells: Evidence for extensive clonal selection, intraclonal affinity maturation, and multiple isotype switches to IgA2 |
| Hovi T.         | 2001           | Inactivated poliovirus vaccine and the final stages of poliovirus eradication                                                                                                                                   |
| Hsieh Y. C.     | 2008           | The transforming Streptococcus pneumoniae in the 21st century                                                                                                                                                   |
| Hsu H. M.       | 2001           | Efficacy of a mass hepatitis B immunization program after switching to recombinant hepatitis B vaccine: A population-based study in Taiwan                                                                      |
| Huang Q. S.     | 2005           | Persistence of oral polio vaccine virus after its removal from the immunisation schedule in New Zealand                                                                                                         |
| Huang S. W.     | 2014           | Mutations in the non-structural protein region contribute to intra-genotypic evolution of enterovirus 71                                                                                                        |
| Huang W. T.     | 2017           | Vaccination and unexplained sudden death risk in Taiwanese infants                                                                                                                                              |
| Ilboudo P. G.   | 2022           | The economic impact of the switch from single- to multi-dose PCV13 vial in Benin                                                                                                                                |
| Iroh Tam P. Y.  | 2016           | An ecological analysis of pertussis disease in Minnesota, 2009-2013                                                                                                                                             |
| Iskedjian M.    | 2010           | Economic impact of the introduction of an acellular pertussis vaccine in Canada: A 6-year analysis                                                                                                              |
| Iwata S.        | 2021           | Drastic reduction in pneumococcal meningitis in children owing to the introduction of pneumococcal conjugate vaccines: Longitudinal analysis from 2002 to 2016 in Japan                                         |
| Izurieta P.     | 2018           | Interpretation of the switch in a childhood pneumococcal vaccination programme from PCV13 to PCV10 in Belgium                                                                                                   |
| Jackson C. G.   | 1979           | Immune response of a patient with deficiency of the fourth component of complement and systemic lupus erythematosus                                                                                             |
| Jackson M. L.   | 2012           | Modeling insights into Haemophilus influenzae type b disease, transmission, and vaccine programs                                                                                                                |
| Jia L.          | 2021           | Payment methods for healthcare providers working in outpatient healthcare settings                                                                                                                              |
| Jin L.          | 1999           | Genetic heterogeneity of mumps virus in the United Kingdom: identification of two new genotypes                                                                                                                 |
| Kalkowska D. A. | 2015           | Modeling options to manage type 1 wild poliovirus imported into Israel in 2013                                                                                                                                  |
| Kanungo S.      | 2017           | Comparison of IPV to tOPV week 39 boost of primary OPV vaccination in Indian infants: an open labelled randomized controlled trial                                                                              |

| First Author      | Year Published | Title                                                                                                                                                                                                                             |
|-------------------|----------------|-----------------------------------------------------------------------------------------------------------------------------------------------------------------------------------------------------------------------------------|
| Kersellius G. D.  | 2020           | Respiratory pathogen surveillance trends and influenza vaccine effectiveness estimates for the 2018-2019 season among Department of Defense beneficiaries                                                                         |
| Khan M. M.        | 2008           | Economics of polio vaccination in the post-eradication era: Should OPV-using countries adopt IPV?                                                                                                                                 |
| Khaskhely N.      | 2012           | Phenotypic analysis of pneumococcal polysaccharide-specific B cells                                                                                                                                                               |
| Kind A. B.        | 2020           | Assessing the epidemiological impact on cervical cancer of switching from 4-valent to 9-valent HPV vaccine within a gender-neutral vaccination programme in Switzerland                                                           |
| Klar S.           | 2014           | Vaccine safety implications of Ontario, Canada's switch from DTaP-IPV to Tdap-IPV for the pre-school booster                                                                                                                      |
| Klein J. O.       | 2002           | Management of the febrile child without a focus of infection in the era of universal pneumococcal immunization                                                                                                                    |
| Klein N. P.       | 2013           | Comparative effectiveness of acellular versus whole-cell pertussis vaccines in teenagers                                                                                                                                          |
| Klugman K. P.     | 2011           | Contribution of vaccines to our understanding of pneumococcal disease                                                                                                                                                             |
| Ko E. J.          | 2018           | Immunology and efficacy of MF59-adjuvanted vaccines                                                                                                                                                                               |
| Kraśnicka J.      | 2018           | Mandatory and recommended vaccinations in Poland in the views of parents                                                                                                                                                          |
| Kristiansen P. A. | 2013           | Phenotypic and genotypic characterization of meningococcal carriage and disease isolates in Burkina Faso after mass vaccination with a serogroup a conjugate vaccine                                                              |
| Krudwig K.        | 2020           | The effects of switching from 10 to 5-dose vials of MR vaccine on vaccination coverage and wastage: A mixed-method study in Zambia                                                                                                |
| Kumar G.          | 2013           | Estimating the cost impact of switching from a vial to a pre-filled syringe mode of administration for the dta a-IPV-HIB '5-in-1' vaccine in infants                                                                              |
| Lai F. Y.         | 2016           | Economic impact of switching rubella IgG methodologies to the prenatal public health program in Alberta                                                                                                                           |
| Landy R.          | 2018           | What cervical screening is appropriate for women who have been vaccinated against high risk HPV? A simulation study                                                                                                               |
| Largeron N.       | 2017           | An estimate of the public health impact and cost-effectiveness of universal vaccination with a 9-valent HPV vaccine in Germany                                                                                                    |
| Le Saux N.        | 2003           | Decrease in hospital admissions for febrile seizures and reports of hypotonic-hyporesponsive episodes presenting to hospital emergency departments since switching to acellular pertussis vaccine in Canada: a report from IMPACT |
| Lee B. Y.         | 2017           | Economic impact of thermostable vaccines                                                                                                                                                                                          |
| Lee S.            | 2015           | Effective long-term prophylaxis against de novo hepatitis b with hepatitis b vaccination in pediatric recipients of HBcAB-positive liver grafts                                                                                   |
| Li J.             | 2018           | Meningococcal disease and control in China: Findings and updates from the Global Meningococcal Initiative (GMI)                                                                                                                   |



| <b>First Author</b> | <b>Year Published</b> | <b>Title</b>                                                                                                                                                                                                 |
|---------------------|-----------------------|--------------------------------------------------------------------------------------------------------------------------------------------------------------------------------------------------------------|
| Li J.               | 2021                  | Seroprevalence of poliovirus antibodies before and after polio vaccine switch in 2012 and 2017 in Beijing                                                                                                    |
| Li X.               | 1998                  | Protection against respiratory syncytial virus infection by DNA immunization                                                                                                                                 |
| Lindsey B. B.       | 2019                  | Effect of a Russian-backbone live-attenuated influenza vaccine with an updated pandemic H1N1 strain on shedding and immunogenicity among children in The Gambia: an open-label, observational, phase 4 study |
| Lipsitch M.         | 2007                  | Strain characteristics of Streptococcus pneumoniae carriage and invasive disease isolates during a cluster-randomized clinical trial of the 7-valent pneumococcal conjugate vaccine                          |
| Litt D. J.          | 2009                  | Changes in genetic diversity of the Bordetella pertussis population in the United Kingdom between 1920 and 2006 reflect vaccination coverage and emergence of a single dominant clonal type                  |
| Liu J.              | 2021                  | Bile Acids Impair Vaccine Response in Children With Biliary Atresia                                                                                                                                          |
| Locht C.            | 2016                  | Pertussis: Where did we go wrong and what can we do about it?                                                                                                                                                |
| Loman N. J.         | 2013                  | Clonal expansion within pneumococcal serotype 6C after use of seven-valent vaccine                                                                                                                           |
| Lopez L. M.         | 2015                  | Education for contraceptive use by women after childbirth                                                                                                                                                    |
| Løvlie A.           | 2020                  | Changes in pneumococcal carriage prevalence and factors associated with carriage in Norwegian children, four years after introduction of PCV13                                                               |
| Macklin G. R.       | 2019                  | Vaccine schedules and the effect on humoral and intestinal immunity against poliovirus: a systematic review and network meta-analysis                                                                        |
| Mahumud R. A.       | 2020                  | Cost-effectiveness evaluations of the 9-Valent human papillomavirus (HPV) vaccine: Evidence from a systematic review                                                                                         |
| Makwana A.          | 2018                  | Rapid Spread of Pneumococcal Nonvaccine Serotype 7C Previously Associated with Vaccine Serotype 19F, England and Wales                                                                                       |
| Manaseki S.         | 1993                  | Mongolia: a health system in transition                                                                                                                                                                      |
| Margeridon S.       | 2005                  | A quasi-monoclonal anti-HBs response can lead to immune escape of 'wild-type' hepatitis B virus                                                                                                              |
| Marin M.            | 2017                  | Guidance for Assessment of Poliovirus Vaccination Status and Vaccination of Children Who Have Received Poliovirus Vaccine Outside the United States                                                          |
| Marshall G. S.      | 2004                  | One for all: newer combination vaccines in practice                                                                                                                                                          |
| Matrajt L., Jr.     | 2010                  | Optimizing vaccine allocation at different points in time during an epidemic                                                                                                                                 |
| Matuschewski K.     | 2011                  | Arrested Plasmodium liver stages as experimental anti-malaria vaccines                                                                                                                                       |
| Mbaeyi C.           | 2018                  | Strategic Response to an Outbreak of Circulating Vaccine-Derived Poliovirus Type 2 - Syria, 2017-2018                                                                                                        |

| <b>First Author</b>  | <b>Year Published</b> | <b>Title</b>                                                                                                                                                                                       |
|----------------------|-----------------------|----------------------------------------------------------------------------------------------------------------------------------------------------------------------------------------------------|
| Mbuagbaw L.          | 2015                  | Health system and community level interventions for improving antenatal care coverage and health outcomes                                                                                          |
| McChlery S. M.       | 2005                  | Clonal analysis of invasive pneumococcal isolates in Scotland and coverage of serotypes by the licensed conjugate polysaccharide pneumococcal vaccine: Possible implications for UK vaccine policy |
| McEllistrem M. C.    | 2003                  | Epidemiology of acute otitis media caused by Streptococcus pneumoniae before and after licensure of the 7-valent pneumococcal protein conjugate vaccine                                            |
| McLean A. R.         | 1991                  | Model-based comparisons of measles immunization strategies using high dose Edmonston-Zagreb type vaccines                                                                                          |
| Meacham R. K.        | 2017                  | Comparison of cidofovir and the measles, mumps, and rubella vaccine in the treatment of recurrent respiratory papillomatosis                                                                       |
| Mennini F. S.        | 2018                  | Cost-effectiveness of switching from trivalent to quadrivalent inactivated influenza vaccines for the at-risk population in Italy                                                                  |
| Mera R.              | 2008                  | Serotype replacement and multiple resistance in Streptococcus pneumoniae after the introduction of the conjugate pneumococcal vaccine                                                              |
| Metcalf B. J.        | 2016                  | Strain features and distributions in pneumococci from children with invasive disease before and after 13-valent conjugate vaccine implementation in the USA                                        |
| Metcalf C. J.        | 2011                  | Modelling the first dose of measles vaccination: the role of maternal immunity, demographic factors, and delivery systems                                                                          |
| Miller E.            | 2001                  | Planning, registration, and implementation of an immunisation campaign against meningococcal serogroup C disease in the UK: a success story                                                        |
| Moffitt K. L.        | 2012                  | Broad antibody and T cell reactivity induced by a pneumococcal whole-cell vaccine                                                                                                                  |
| Moore M. R.          | 2008                  | Population snapshot of emergent Streptococcus pneumoniae serotype 19A in the United States, 2005                                                                                                   |
| Mueller J. E.        | 2009                  | Environmental poliovirus surveillance during oral poliovirus vaccine and inactivated poliovirus vaccine use in Córdoba Province, Argentina                                                         |
| Munabi-Babigumira S. | 2017                  | Factors that influence the provision of intrapartum and postnatal care by skilled birth attendants in low- and middle-income countries: a qualitative evidence synthesis                           |
| Nagy L.              | 2016                  | The Clinical Impact and Cost Effectiveness of Quadrivalent Versus Trivalent Influenza Vaccination in Finland                                                                                       |
| Nair M.              | 2012                  | Protein conjugate polysaccharide vaccines: challenges in development and global implementation                                                                                                     |
| Nair N.              | 2007                  | Age-dependent differences in IgG isotype and avidity induced by measles vaccine received during the first year of life                                                                             |
| Navarro Torné A.     | 2014                  | European enhanced surveillance of invasive pneumococcal disease in 2010: data from 26 European countries in the post-heptavalent conjugate vaccine era                                             |

| <b>First Author</b> | <b>Year Published</b> | <b>Title</b>                                                                                                                                                                                              |
|---------------------|-----------------------|-----------------------------------------------------------------------------------------------------------------------------------------------------------------------------------------------------------|
| Ng S. S.            | 2018                  | Systematic review of cost-effectiveness studies of human papillomavirus (HPV) vaccination: 9-Valent vaccine, gender-neutral and multiple age cohort vaccination                                           |
| Nieto Guevara J.    | 2020                  | Interchangeability between pneumococcal conjugate vaccines for pediatric use: a systematic literature review                                                                                              |
| Nogier C.           | 2015                  | Can a Compact Pre-Filled Auto-Disable Injection System (cPAD) Save Costs for DTP-HepB-Hib Vaccine as Compared with Single-Dose (SDV) and Multi-Dose Vials (MDV)? Evidence from Cambodia, Ghana, and Peru  |
| Nokes D. J.         | 1990                  | Measles immunization strategies for countries with high transmission rates: Interim guidelines predicted using a mathematical model                                                                       |
| Nourbakhsh S.       | 2021                  | Effectiveness and cost-effectiveness of RSV infant and maternal immunization programs: A case study of Nunavik, Canada                                                                                    |
| O'Connor D.         | 2017                  | High-dimensional assessment of B-cell responses to quadrivalent meningococcal conjugate and plain polysaccharide vaccine                                                                                  |
| Olarte L.           | 2017                  | Emergence of Multidrug-Resistant Pneumococcal Serotype 35B among Children in the United States                                                                                                            |
| Olivera I.          | 2020                  | Valuing the cost of improving Chilean primary vaccination: a cost minimization analysis of a hexavalent vaccine                                                                                           |
| Ozawa D.            | 2015                  | Impact of the Seven-valent Pneumococcal Conjugate Vaccine on Acute Otitis Media in Japanese Children: Emergence of Serotype 15A Multidrug-resistant Streptococcus pneumoniae in Middle Ear Fluid Isolates |
| Pai R.              | 2005                  | Postvaccine genetic structure of Streptococcus pneumoniae serotype 19A from children in the United States                                                                                                 |
| Park J. B.          | 2008                  | Hepatitis B virus vaccine switch program for prevention of de novo hepatitis B virus infection in pediatric patients                                                                                      |
| Pascale J. M.       | 2021                  | Burden of Seasonal Influenza A and B in Panama from 2011 to 2017: An Observational Retrospective Database Study                                                                                           |
| Patel C.            | 2018                  | The impact of 10 years of human papillomavirus (HPV) vaccination in Australia: What additional disease burden will a nonavalent vaccine prevent?                                                          |
| Pavlovic M.         | 2010                  | Clinical and molecular evidence for association of SLE with parvovirus B19                                                                                                                                |
| Peckeu L.           | 2021                  | Impact and effectiveness of the 10-valent pneumococcal conjugate vaccine on invasive pneumococcal disease among children under 5 years of age in the Netherlands                                          |
| Perdrizet J.        | 2021                  | Cost-effectiveness analysis of replacing the 10-valent pneumococcal conjugate vaccine (PCV10) with the 13-valent pneumococcal conjugate vaccine (PCV13) in Brazil infants                                 |
| Perdrizet J.        | 2021                  | Cost-Effectiveness of the 13-Valent Pneumococcal Conjugate Vaccine (PCV13) Versus Lower-Valent Alternatives in Filipino Infants                                                                           |
| Perez Chacon G.     | 2021                  | Whole-cell pertussis vaccine in early infancy for the prevention of allergy in children                                                                                                                   |

| First Author         | Year Published | Title                                                                                                                                                                                                                                  |
|----------------------|----------------|----------------------------------------------------------------------------------------------------------------------------------------------------------------------------------------------------------------------------------------|
| Perkins T.           | 2017           | Smith-Magenis Syndrome Patients Often Display Antibody Deficiency but Not Other Immune Pathologies                                                                                                                                     |
| Phillips C. B.       | 2006           | The switch to new conjugated vaccines may compromise immunisation coverage for refugees                                                                                                                                                |
| Picazo J.            | 2017           | Effect of the different 13-valent pneumococcal conjugate vaccination uptakes on the invasive pneumococcal disease in children: Analysis of a hospital-based and population-based surveillance study in Madrid, Spain, 2007-2015        |
| Picazo J.            | 2013           | Expansion of serotype coverage in the universal pediatric vaccination calendar: short-term effects on age- and serotype-dependent incidence of invasive pneumococcal clinical presentations in Madrid, Spain                           |
| Picazo J.            | 2013           | Impact of introduction of conjugate vaccines in the vaccination schedule on the incidence of pediatric invasive pneumococcal disease requiring hospitalization in Madrid 2007 to 2011                                                  |
| Pichon B.            | 2013           | Changes in molecular epidemiology of streptococcus pneumoniae causing meningitis following introduction of pneumococcal conjugate vaccination in England and Wales                                                                     |
| Plotkin S.           | 2015           | The history of vaccination against cytomegalovirus                                                                                                                                                                                     |
| Pollard A. J.        | 1999           | Humoral immune responses to Neisseria meningitidis in children                                                                                                                                                                         |
| Poore P.             | 1992           | Availability of quality vaccines: policies of a non-government organization                                                                                                                                                            |
| Portnoy A.           | 2021           | Impact and cost-effectiveness of strategies to accelerate cervical cancer elimination: A model-based analysis                                                                                                                          |
| Procaccianti M.      | 2020           | First Case of Typhoid Fever due to Extensively Drug-resistant Salmonella enterica serovar Typhi in Italy                                                                                                                               |
| Pugh S.              | 2020           | Estimating the Impact of Switching from a Lower to Higher Valent Pneumococcal Conjugate Vaccine in Colombia, Finland, and The Netherlands: A Cost-Effectiveness Analysis                                                               |
| Qiu J.               | 2017           | Immunogenicity and safety evaluation of bivalent types 1 and 3 oral poliovirus vaccine by comparing different poliomyelitis vaccination schedules in China: A randomized controlled non-inferiority clinical trial                     |
| Radke S.             | 2017           | Age-specific effectiveness following each dose of acellular pertussis vaccine among infants and children in New Zealand                                                                                                                |
| Raes M.              | 2016           | Epidemiological trends for hospital admissions for acute rotavirus gastroenteritis in Belgium following the introduction of routine rotavirus vaccination and the subsequent switch from lyophilized to liquid formulation of rotarix™ |
| Rivera-Olivero I. A. | 2009           | Multiplex PCR reveals a high rate of nasopharyngeal pneumococcal 7-valent conjugate vaccine serotypes co-colonizing indigenous Warao children in Venezuela                                                                             |
| Rodríguez A. C.      | 2017           | Cervical cancer prevention in upper middle-income countries                                                                                                                                                                            |

| <b>First Author</b> | <b>Year Published</b> | <b>Title</b>                                                                                                                                                                                     |
|---------------------|-----------------------|--------------------------------------------------------------------------------------------------------------------------------------------------------------------------------------------------|
| Ruiz García Y.      | 2021                  | CIRCULATING CLONAL COMPLEXES AND SEQUENCE TYPES OF STREPTOCOCCUS PNEUMONIAE SEROTYPE 19A WORLDWIDE: THE IMPORTANCE OF MULTIDRUG RESISTANCE: A SYSTEMATIC LITERATURE REVIEW                       |
| Ruiz-Palacios G. M. | 2020                  | Public health and economic impact of switching from a trivalent to a quadrivalent inactivated influenza vaccine in Mexico                                                                        |
| Ryan G.             | 2022                  | Challenges to Adolescent HPV Vaccination and Implementation of Evidence-Based Interventions to Promote Vaccine Uptake During the COVID-19 Pandemic: "HPV Is Probably Not at the Top of Our List" |
| Sáez-Llorens X.     | 2016                  | Immunogenicity and safety of a novel monovalent high-dose inactivated poliovirus type 2 vaccine in infants: A comparative, observer-blind, randomised, controlled trial                          |
| Sandmann F.         | 2021                  | Evaluating the impact of a continued maternal pertussis immunisation programme in England: A modelling study and cost-effectiveness analysis                                                     |
| Sangrujee N.        | 2004                  | Cost analysis of post-polio certification immunization policies                                                                                                                                  |
| Scheifele D. W.     | 2003                  | Immunization Monitoring Program, Active: a model of active surveillance of vaccine safety                                                                                                        |
| Schmidt-Ott R.      | 2020                  | Assessing direct and indirect effects of pediatric influenza vaccination in Germany by individual-based simulations                                                                              |
| Schonberger L. B.   | 1976                  | Vaccine-associated poliomyelitis in the United States, 1961-1972                                                                                                                                 |
| Scott A.            | 2011                  | The effect of financial incentives on the quality of health care provided by primary care physicians                                                                                             |
| Sealey K. L.        | 2015                  | Genomic analysis of isolates from the United Kingdom 2012 pertussis outbreak reveals that vaccine antigen genes are unusually fast evolving                                                      |
| Setchanova L. P.    | 2015                  | Dominance of multidrug-resistant Denmark(14)-32 (ST230) clone among Streptococcus pneumoniae serotype 19A isolates causing pneumococcal disease in Bulgaria from 1992 to 2013                    |
| Shaghghi M.         | 2019                  | Vaccine-Derived Poliovirus Infection among Patients with Primary Immunodeficiency and Effect of Patient Screening on Disease Outcomes, Iran                                                      |
| Shah I.             | 2008                  | Acute demyelinating encephalomyelitis due to neural antirabies vaccine                                                                                                                           |
| Sheppard C. L.      | 2019                  | The Genomics of Streptococcus Pneumoniae Carriage Isolates from UK Children and Their Household Contacts, Pre-PCV7 to Post-PCV13                                                                 |
| Shibl A. M.         | 2012                  | Antibiotic resistance and serotype distribution of invasive pneumococcal diseases before and after introduction of pneumococcal conjugate vaccine in the Kingdom of Saudi Arabia (KSA)           |
| Shuel M.            | 2011                  | Invasive Haemophilus influenzae in British Columbia: non-Hib and non-typeable strains causing disease in children and adults                                                                     |

| <b>First Author</b> | <b>Year Published</b> | <b>Title</b>                                                                                                                                                                                                             |
|---------------------|-----------------------|--------------------------------------------------------------------------------------------------------------------------------------------------------------------------------------------------------------------------|
| Shukla G. S.        | 2017                  | Vaccine-draining lymph nodes of cancer patients for generating anti-cancer antibodies                                                                                                                                    |
| Silveira M. M.      | 2021                  | Surveillance of invasive meningococcal disease in the south of Brazil: considerations of immunization programme                                                                                                          |
| Sime W. T.          | 2016                  | The impact of ten-valent pneumococcal conjugate vaccine (pcv10) on streptococcus pneumoniae nasopharyngeal carriage rate: Phenotypic and genetic diversity of isolates from vaccinated children in addis ababa, Ethiopia |
| Simões A. S.        | 2011                  | Clonal evolution leading to maintenance of antibiotic resistance rates among colonizing Pneumococci in the PCV7 era in Portugal                                                                                          |
| Singanayagam A.     | 2018                  | Urgent challenges in implementing live attenuated influenza vaccine                                                                                                                                                      |
| Singh M.            | 2018                  | Inequality in the immunization schedules of different states of the same country: Are we aware?                                                                                                                          |
| Singleton R.        | 2000                  | Experience with the prevention of invasive Haemophilus influenzae type b disease by vaccination in Alaska: the impact of persistent oropharyngeal carriage                                                               |
| Siu T.              | 2008                  | Impact of routine immunization using meningococcal C conjugate vaccine on invasive meningococcal disease in British Columbia                                                                                             |
| Sizaire V.          | 2014                  | Increase of pertussis incidence in 2010 to 2012 after 12 years of low circulation in Spain                                                                                                                               |
| Small T. N.         | 2011                  | Safety and immunogenicity of the 13-valent protein-conjugated pneumococcal vaccine(PCV13) following related and unrelated hematopoietic stem cell transplantation (HCT)                                                  |
| Soto J. A.          | 2018                  | Recombinant BCG Vaccines Reduce Pneumovirus-Caused Airway Pathology by Inducing Protective Humoral Immunity                                                                                                              |
| Sparrow E.          | 2021                  | Global production capacity of seasonal and pandemic influenza vaccines in 2019                                                                                                                                           |
| Stanford J. L.      | 1991                  | Improving on BCG                                                                                                                                                                                                         |
| Steens A.           | 2015                  | Decreased Carriage and Genetic Shifts in the Streptococcus pneumoniae Population After Changing the Seven-valent to the Thirteen-valent Pneumococcal Vaccine in Norway                                                   |
| Stoecker C.         | 2013                  | Cost-effectiveness of using 2 vs 3 primary doses of 13-valent pneumococcal conjugate vaccine                                                                                                                             |
| Suwantika A. A.     | 2020                  | Impact of switch options on the economics of pneumococcal conjugate vaccine (PCV) introduction in Indonesia                                                                                                              |
| Tagbo B. N.         | 2020                  | Randomized Controlled Clinical Trial of bivalent Oral Poliovirus Vaccine and Inactivated Poliovirus Vaccine in Nigerian Children                                                                                         |
| Taha M. K.          | 2020                  | Recent changes of invasive meningococcal disease in France: arguments to revise the vaccination strategy in view of those of other countries                                                                             |

| <b>First Author</b>     | <b>Year Published</b> | <b>Title</b>                                                                                                                                                                                                                           |
|-------------------------|-----------------------|----------------------------------------------------------------------------------------------------------------------------------------------------------------------------------------------------------------------------------------|
| Taniuchi M.             | 2017                  | Community transmission of type 2 poliovirus after cessation of trivalent oral polio vaccine in Bangladesh: an open-label cluster-randomised trial and modelling study                                                                  |
| Teljeur C.              | 2018                  | Economic Evaluation of Selective Neonatal Bacillus Calmette-Guérin Vaccination of High-risk Infants in Ireland                                                                                                                         |
| Temime L.               | 2008                  | Impact of capsular switch on invasive pneumococcal disease incidence in a vaccinated population                                                                                                                                        |
| Thanawastien A.         | 2015                  | Conjugate-like immunogens produced as protein capsular matrix vaccines                                                                                                                                                                 |
| Thommes E. W.           | 2015                  | Cost-effectiveness evaluation of quadrivalent influenza vaccines for seasonal influenza prevention: A dynamic modeling study of Canada and the United Kingdom                                                                          |
| Thommes E. W.           | 2014                  | Examining Ontario's universal influenza immunization program with a multi-strain dynamic model                                                                                                                                         |
| Thommes E. W.           | 2017                  | Review of seasonal influenza in Canada: Burden of disease and the cost-effectiveness of quadrivalent inactivated influenza vaccines                                                                                                    |
| Thompson K. M.          | 2008                  | The risks, costs, and benefits of possible future global policies for managing polioviruses                                                                                                                                            |
| Thompson K. M.          | 2012                  | Trends in the risk of U.S. polio outbreaks and poliovirus vaccine availability for response                                                                                                                                            |
| Tin Tin Htar M.         | 2020                  | Advance system testing: Vaccine benefit studies using multi-country electronic health data - The example of pertussis vaccination                                                                                                      |
| Toapanta F. R.          | 2016                  | Oral Challenge with Wild-Type Salmonella Typhi Induces Distinct Changes in B Cell Subsets in Individuals Who Develop Typhoid Disease                                                                                                   |
| Toltzis P.              | 2005                  | The epidemiology of childhood pneumococcal disease in the United States in the era of conjugate vaccine use                                                                                                                            |
| Tong H. H.              | 2000                  | Evaluation of phase variation of nontypeable Haemophilus influenzae lipooligosaccharide during nasopharyngeal colonization and development of otitis media in the chinchilla model                                                     |
| Tramper-Stranders G. A. | 2018                  | Childhood community-acquired pneumonia: A review of etiology- and antimicrobial treatment studies                                                                                                                                      |
| Tsang R. S. W.          | 2021                  | A Narrative Review of the Molecular Epidemiology and Laboratory Surveillance of Vaccine Preventable Bacterial Meningitis Agents: Streptococcus pneumoniae, Neisseria meningitidis, Haemophilus influenzae and Streptococcus agalactiae |
| Tsilifis C.             | 2020                  | BCG lymphadenitis: A potential complication of immune reconstitution following haematopoietic stem cell transplant                                                                                                                     |
| Tucker A. W.            | 2001                  | Cost-effectiveness analysis of changing from live oral poliovirus vaccine to inactivated poliovirus vaccine in Australia                                                                                                               |

| <b>First Author</b> | <b>Year Published</b> | <b>Title</b>                                                                                                                                                                  |
|---------------------|-----------------------|-------------------------------------------------------------------------------------------------------------------------------------------------------------------------------|
| Urueña A.           | 2021                  | Cost-effectiveness analysis of switching from trivalent to quadrivalent seasonal influenza vaccine in Argentina                                                               |
| Valdin H. L.        | 2017                  | Influenza vaccines effectiveness 2013-14 through 2015-16, a test-negative study in children                                                                                   |
| Valente C.          | 2012                  | Decrease in pneumococcal co-colonization following vaccination with the seven-valent pneumococcal conjugate vaccine                                                           |
| Van de Poel E.      | 2016                  | Impact of Performance-Based Financing in a Low-Resource Setting: A Decade of Experience in Cambodia                                                                           |
| Van De Velde N.     | 2012                  | Population-level impact of the bivalent, quadrivalent, and nonavalent human papillomavirus vaccines: A model-based analysis                                                   |
| van der Linden M.   | 2015                  | Effects of Infant Pneumococcal Conjugate Vaccination on Serotype Distribution in Invasive Pneumococcal Disease among Children and Adults in Germany                           |
| van Tonder A. J.    | 2015                  | Genomics Reveals the Worldwide Distribution of Multidrug-Resistant Serotype 6E Pneumococci                                                                                    |
| Varghese J.         | 2020                  | Multistate population and whole genome sequence-based strain surveillance of invasive pneumococci recovered in the USA during 2017                                            |
| Varghese T.         | 2022                  | Understanding Rotavirus Vaccine Efficacy and Effectiveness in Countries with High Child Mortality                                                                             |
| Vashishtha V. M.    | 2008                  | Recommendations of 2nd national consultative meeting of Indian Academy of Pediatrics (IAP) on polio eradication and improvement of routine immunization                       |
| Vestjens S. M. T.   | 2019                  | Twelve years of pneumococcal conjugate vaccination in the Netherlands: Impact on incidence and clinical outcomes of invasive pneumococcal disease                             |
| Vissers M.          | 2018                  | Increased carriage of non-vaccine serotypes with low invasive disease potential four years after switching to the 10-valent pneumococcal conjugate vaccine in The Netherlands |
| Voorman A.          | 2022                  | Analysis of population immunity to poliovirus following cessation of trivalent oral polio vaccine                                                                             |
| Walter E. B.        | 2022                  | Prevention of pneumococcal infections in childhood: Two decades of progress                                                                                                   |
| Wang L.             | 2016                  | Immunogenicity and safety of an inactivated quadrivalent influenza vaccine in US children 6-35 months of age during 2013-2014: Results from a phase II randomized trial       |
| Wang X.             | 2015                  | Changes in the Population Structure of Invasive Neisseria meningitidis in the United States After Quadrivalent Meningococcal Conjugate Vaccine Licensure                      |
| Wasserman M.        | 2018                  | Dynamic transmission modelling to address infant pneumococcal conjugate vaccine schedule modifications in the UK                                                              |
| Wasserman M.        | 2019                  | Modeling the sustained use of the 13-valent pneumococcal conjugate vaccine compared to switching to the 10-valent vaccine in Mexico                                           |



| <b>First Author</b>             | <b>Year Published</b> | <b>Title</b>                                                                                                                                                                                                   |
|---------------------------------|-----------------------|----------------------------------------------------------------------------------------------------------------------------------------------------------------------------------------------------------------|
| Wedlock P. T.                   | 2021                  | Should countries switch to using five- or ten-dose rotavirus vaccines now that they are available?                                                                                                             |
| WHO Rabies Modelling Consortium | 2019                  | The potential effect of improved provision of rabies post-exposure prophylaxis in Gavi-eligible countries: a modelling study                                                                                   |
| Wijesinghe P. R.                | 2016                  | Immunogenicity of live attenuated Japanese encephalitis SA 14-14-2 vaccine among Sri Lankan children with previous receipt of inactivated JE vaccine                                                           |
| Wilder-Smith A.                 | 2002                  | Crossover vaccination with quadrivalent meningococcal vaccine (against A/C/Y/W-135) following recent application of bivalent meningococcal vaccine (against A/C): assessment of safety and side effect profile |
| Williams B. G.                  | 1995                  | Measles vaccination policy                                                                                                                                                                                     |
| Wilson M. R.                    | 2018                  | Response to McGirr et al.'s Comment on "Clinical and Economic Impact of a Potential Switch from 13-Valent to 10-Valent Pneumococcal Conjugate Infant Vaccination in Canada"                                    |
| Wilson M. R.                    | 2021                  | Validation of a Novel Forecasting Method for Estimating the Impact of Switching Pneumococcal Conjugate Programs: Evidence from Belgium                                                                         |
| Wilson M.                       | 2018                  | Clinical and Economic Impact of a Potential Switch from 13-Valent to 10-Valent Pneumococcal Conjugate Infant Vaccination in Canada                                                                             |
| Wnukowski-Mtonga P.             | 2020                  | Scientific evidence supporting recommendations on the use of the 9-valent HPV vaccine in a 2-dose vaccine schedule in Australia                                                                                |
| World Health O.                 | 2017                  | Polio vaccines: WHO position paper, March 2016-recommendations                                                                                                                                                 |
| Wouters I.                      | 2019                  | Follow-up of serotype distribution and antimicrobial susceptibility of Streptococcus pneumoniae in child carriage after a PCV13-to-PCV10 vaccine switch in Belgium                                             |
| Wouters I.                      | 2020                  | How nasopharyngeal pneumococcal carriage evolved during and after a PCV13-to-PCV10 vaccination programme switch in Belgium, 2016 to 2018                                                                       |
| Wouters I.                      | 2018                  | Nasopharyngeal s. pneumoniae carriage and density in Belgian infants after 9 years of pneumococcal conjugate vaccine programme                                                                                 |
| Wu D. B. C.                     | 2015                  | Choosing between 7-, 10- and 13-valent pneumococcal conjugate vaccines in childhood: A review of economic evaluations (2006-2014)                                                                              |
| Wu Y.                           | 2014                  | Antitoxins for diphtheria and tetanus decline more slowly after vaccination with DTwP than with DTaP: A study in a Chinese population                                                                          |
| Xu J.                           | 2021                  | Immunogenicity of sequential poliovirus vaccination schedules with different strains of poliomyelitis vaccines in Chongqing, China: a cross-sectional survey                                                   |
| Xu J.                           | 2020                  | Sero-survey of polio antibodies and quality of acute flaccid paralysis surveillance in Chongqing, China: A cross-sectional study                                                                               |

| First Author                    | Year Published | Title                                                                                                                                                           |
|---------------------------------|----------------|-----------------------------------------------------------------------------------------------------------------------------------------------------------------|
| Yan D.                          | 2021           | Implication of a High Risk for Type 2 Vaccine-Derived Poliovirus Emergence and Transmission after the Switch from Trivalent to Bivalent Oral Poliovirus Vaccine |
| Yang R.                         | 2005           | B lymphocyte activation by human papillomavirus-like particles directly induces Ig class switch recombination via TLR4-MyD88                                    |
| Yang W.                         | 2014           | The budget impact of controlling wastage with smaller vials: A data driven model of session sizes in Bangladesh, India (Uttar Pradesh), Mozambique, and Uganda  |
| Yi D. Y.                        | 2016           | Changes of hepatitis B virus antibody titer by children's age and effectiveness of booster vaccination in endemic area                                          |
| Yuan B.                         | 2017           | Payment methods for outpatient care facilities                                                                                                                  |
| Yun K. W.                       | 2018           | Genetic structures of invasive Streptococcus pneumoniae isolates from Korean children obtained between 1995 and 2013                                            |
| Zeddeman A.                     | 2014           | Investigations into the emergence of pertactin-deficient Bordetella pertussis isolates in six European countries, 1996 to 2012                                  |
| Zhang L.                        | 2014           | Acellular vaccines for preventing whooping cough in children                                                                                                    |
| Zhao H.                         | 2021           | Circulation of Type 2 Vaccine-Derived Poliovirus in China in 2018-2019                                                                                          |
| Zhao T.                         | 2021           | Reduced mucosal immunity to poliovirus after cessation of trivalent oral polio vaccine                                                                          |
| Zurbriggen S.                   | 2008           | Isolation of Sabin-like polioviruses from wastewater in a country using inactivated polio vaccine                                                               |
| <b>Not vaccines of interest</b> |                |                                                                                                                                                                 |
| Brinkman D. M. C.               | 2003           | Vaccination with Rabies to Study the Humoral and Cellular Immune Response to a T-Cell Dependent Neoantigen in Man                                               |
| Bokharaie V. S.                 | 2021           | A study on the effects of containment policies and vaccination on the spread of SARS-CoV-2                                                                      |
| Changalucha J.                  | 2019           | The need to improve access to rabies post-exposure vaccines: Lessons from Tanzania                                                                              |
| He T.                           | 2016           | Chronic HBV: which pregnant women should be treated?                                                                                                            |
| Kasting M. L.                   | 2020           | Public perceptions of the effectiveness of recommended non-pharmaceutical intervention behaviors to mitigate the spread of SARS-CoV-2                           |
| Rincon-Arevalo H.               | 2021           | Impaired humoral immunity to SARS-CoV-2 BNT162b2 vaccine in kidney transplant recipients and dialysis patients                                                  |
| Unknown author                  | 2018           | Crisis-driven cholera resurgence switches focus to oral vaccine                                                                                                 |

**Appendix S4** Quality assessment of narrative review articles using a scale for a quality assessment of narrative review articles (SANRA)

| <b>SANRA, a scale for a quality assessment of narrative review articles</b> | Bahl, 2017 | Califano, 2016 | Fahmy, 2017 | Gamage, 2018 | Garg, 2018 | Garon, 2016 | Garon, 2017 | Gurung, 2017 | Hampton, 2016 | Hampton, 2017 | Horn, 2021 |
|-----------------------------------------------------------------------------|------------|----------------|-------------|--------------|------------|-------------|-------------|--------------|---------------|---------------|------------|
| Justification of the articles importance for readership                     | 2          | 1              | 2           | 2            | 2          | 2           | 2           | 2            | 2             | 2             | 2          |
| Statement of concrete aims or formulation of questions                      | 2          | 2              | 2           | 1            | 2          | 1           | 1           | 1            | 1             | 2             | 2          |
| Description of the literature search                                        | 0          | 2              | 0           | 0            | 0          | 0           | 0           | 0            | 0             | 0             | 0          |
| Referencing                                                                 | 2          | 2              | 2           | 2            | 2          | 2           | 2           | 2            | 1             | 2             | 2          |
| Scientific Reasoning                                                        | 2          | 1              | 2           | 1            | 2          | 2           | 2           | 2            | 2             | 2             | 2          |
| Appropriate presentation of data                                            | 2          | 2              | 2           | 2            | 2          | 2           | 2           | 2            | 2             | 2             | 2          |
| <b>Sum</b>                                                                  | <b>10</b>  | <b>10</b>      | <b>10</b>   | <b>8</b>     | <b>10</b>  | <b>9</b>    | <b>9</b>    | <b>9</b>     | <b>8</b>      | <b>10</b>     | <b>10</b>  |

**Appendix S4** Quality assessment of narrative review articles using a scale for a quality assessment of narrative review articles (SANRA)  
(continued)

| <b>SANRA, a scale for a quality assessment of narrative review articles</b> | Icardi, 2018 | Jog, 2016 | John, 2013 | Menning, 2017 | Nafi, 2019 | Orenstein, 2015 | Pedreira, 2017 | Pervaiz, 2017 | Ramirez Gonzalez, 2017 | Snelling, 2015 | Tevi-Benissan, 2017 | Thacker, 2016 |
|-----------------------------------------------------------------------------|--------------|-----------|------------|---------------|------------|-----------------|----------------|---------------|------------------------|----------------|---------------------|---------------|
| Justification of the articles importance for readership                     | 1            | 2         | 2          | 2             | 2          | 2               | 2              | 2             | 2                      | 1              | 2                   | 2             |
| Statement of concrete aims or formulation of questions                      | 0            | 1         | 2          | 2             | 1          | 2               | 2              | 2             | 2                      | 1              | 2                   | 1             |
| Description of the literature search                                        | 0            | 0         | 0          | 0             | 0          | 0               | 0              | 0             | 0                      | 0              | 0                   | 0             |
| Referencing                                                                 | 2            | 1         | 2          | 2             | 2          | 2               | 2              | 1             | 2                      | 2              | 2                   | 2             |
| Scientific Reasoning                                                        | 1            | 1         | 2          | 2             | 1          | 2               | 2              | 2             | 2                      | 2              | 2                   | 1             |
| Appropriate presentation of data                                            | 2            | 2         | 2          | 2             | 2          | 2               | 2              | 2             | 2                      | 2              | 2                   | 1             |
| Sum                                                                         | 6            | 7         | 10         | 10            | 8          | 10              | 10             | 9             | 10                     | 8              | 10                  | 7             |

**Appendix S4** Quality assessment of narrative review articles using a scale for a quality assessment of narrative review articles (SANRA)  
(continued)

| <b>SANRA, a scale for a quality assessment of narrative review articles</b> | Fine, 1999 | Pan American Health Organization, 2017 |
|-----------------------------------------------------------------------------|------------|----------------------------------------|
| Justification of the articles importance for readership                     | 2          | 2                                      |
| Statement of concrete aims or formulation of questions                      | 2          | 2                                      |
| Description of the literature search                                        | 0          | 0                                      |
| Referencing                                                                 | 2          | 2                                      |
| Scientific Reasoning                                                        | 2          | 2                                      |
| Appropriate presentation of data                                            | 2          | 2                                      |
| Sum                                                                         | 10         | 10                                     |

**Table S5** Quality assessment of survey study using A Consensus-Based Checklist for Reporting of Survey Studies (CROSS)

| <b>A Consensus-Based Checklist for Reporting of Survey Studies (CROSS)</b>                                                                                                                                                                                                                                                                                        | <b>Freed, 2006</b> | <b>Usuf, 2014</b> | <b>Kaucley, 2020</b> |
|-------------------------------------------------------------------------------------------------------------------------------------------------------------------------------------------------------------------------------------------------------------------------------------------------------------------------------------------------------------------|--------------------|-------------------|----------------------|
| <b>Title and abstract</b>                                                                                                                                                                                                                                                                                                                                         |                    |                   |                      |
| State the word “survey” along with a commonly used term in title or abstract to introduce the study’s design.                                                                                                                                                                                                                                                     | Yes                | Yes               | Yes                  |
| Provide an informative summary in the abstract, covering background, objectives, methods, findings/results, interpretation/discussion, and conclusions.                                                                                                                                                                                                           | Yes                | Yes               | Yes                  |
| <b>Introduction</b>                                                                                                                                                                                                                                                                                                                                               |                    |                   |                      |
| Provide a background about the rationale of study, what has been previously done, and why this survey is needed                                                                                                                                                                                                                                                   | Yes                | Yes               | Yes                  |
| Identify specific purposes, aims, goals, or objectives of the study.                                                                                                                                                                                                                                                                                              | Yes                | Yes               | Yes                  |
| <b>Methods</b>                                                                                                                                                                                                                                                                                                                                                    |                    |                   |                      |
| Specify the study design in the methods section with a commonly used term (e.g., cross-sectional or longitudinal).                                                                                                                                                                                                                                                | Unclear            | Yes               | Yes                  |
| Describe the questionnaire (e.g., number of sections, number of questions, number and names of instruments used).                                                                                                                                                                                                                                                 | Unclear            | Yes               | No                   |
| Describe all questionnaire instruments that were used in the survey to measure particular concepts. Report target population, reported validity and reliability information, scoring/classification procedure, and reference links (if any).                                                                                                                      | Yes                | Yes               | No                   |
| Provide information on pretesting of the questionnaire, if performed (in the article or in an online supplement). Report the method of pretesting, number of times questionnaire was pre-tested, number and demographics of participants used for pretesting, and the level of similarity of demographics between pre-testing participants and sample population. | Unclear            | Yes               | No                   |
| Questionnaire if possible, should be fully provided (in the article, or as appendices or as an online supplement).                                                                                                                                                                                                                                                | No                 | No                | No                   |
| Describe the study population (i.e., background, locations, eligibility criteria for participant inclusion in survey, exclusion criteria).                                                                                                                                                                                                                        | Yes                | Yes               | Yes                  |
| Describe the sampling techniques used (e.g., single stage or multistage sampling, simple random sampling, stratified sampling, cluster sampling, convenience sampling). Specify the locations of sample participants whenever clustered sampling was applied                                                                                                      | Yes                | No                | Unclear              |
| Provide information on sample size, along with details of sample size calculation.                                                                                                                                                                                                                                                                                | Yes                | No                | Unclear              |
| Describe how representative the sample is of the study population (or target population if possible), particularly for population-based surveys.                                                                                                                                                                                                                  | No                 | Yes               | Yes                  |

| <b>A Consensus-Based Checklist for Reporting of Survey Studies (CROSS)</b>                                                                                                                                                                                                            | <b>Freed, 2006</b> | <b>Usuf, 2014</b> | <b>Kaucley, 2020</b> |
|---------------------------------------------------------------------------------------------------------------------------------------------------------------------------------------------------------------------------------------------------------------------------------------|--------------------|-------------------|----------------------|
| Provide information on modes of questionnaire administration, including the type and number of contacts, the location where the survey was conducted (e.g., outpatient room or by use of online tools, such as SurveyMonkey).                                                         | Yes                | Yes               | Yes                  |
| Provide information of survey's time frame, such as periods of recruitment, exposure, and follow-up days.                                                                                                                                                                             | Yes                | Unclear           | Yes                  |
| →For non-web-based surveys, provide approaches to minimize human error in data entry.<br>→For web-based surveys, provide approaches to prevent “multiple participation” of participants.                                                                                              | No                 | No                | No                   |
| Describe any preparation process before conducting the survey (e.g., interviewers' training process, advertising the survey).                                                                                                                                                         | Yes                | Yes               | No                   |
| Provide information on ethical approval for the survey if obtained, including informed consent, institutional review board [IRB] approval, Helsinki declaration, and good clinical practice [GCP] declaration (as appropriate).                                                       | No                 | No                | Yes                  |
| Provide information about survey anonymity and confidentiality and describe what mechanisms were used to protect unauthorized access.                                                                                                                                                 | No                 | No                | No                   |
| Describe statistical methods and analytical approach. Report the statistical software that was used for data analysis.                                                                                                                                                                | Yes                | Yes               | Yes                  |
| Report any modification of variables used in the analysis, along with reference (if available).                                                                                                                                                                                       | No                 | No                | No                   |
| Report details about how missing data was handled. Include rate of missing items, missing data mechanism (i.e., missing completely at random [MCAR], missing at random [MAR] or missing not at random [MNAR]) and methods used to deal with missing data (e.g., multiple imputation). | No                 | No                | No                   |
| State how non-response error was addressed.                                                                                                                                                                                                                                           | No                 | No                | No                   |
| For longitudinal surveys, state how loss to follow-up was addressed.                                                                                                                                                                                                                  | NA                 | NA                | NA                   |
| Indicate whether any methods such as weighting of items or propensity scores have been used to adjust for non-representativeness of the sample                                                                                                                                        | No                 | No                | No                   |
| Describe any sensitivity analysis conducted.                                                                                                                                                                                                                                          | No                 | No                | No                   |
| <b>Results</b>                                                                                                                                                                                                                                                                        |                    |                   |                      |
| Report numbers of individuals at each stage of the study. Consider using a flow diagram, if possible                                                                                                                                                                                  | Unclear            | Yes               | Yes                  |
| Provide reasons for non-participation at each stage, if possible.                                                                                                                                                                                                                     | Yes                | No                | No                   |

| <b>A Consensus-Based Checklist for Reporting of Survey Studies (CROSS)</b>                                                                                                                                                      | <b>Freed, 2006</b> | <b>Usuf, 2014</b> | <b>Kaucley, 2020</b> |
|---------------------------------------------------------------------------------------------------------------------------------------------------------------------------------------------------------------------------------|--------------------|-------------------|----------------------|
| Report response rate, present the definition of response rate or the formula used to calculate response rate.                                                                                                                   | Yes                | No                | No                   |
| Provide information to define how unique visitors are determined. Report number of unique visitors along with relevant proportions (e.g., view proportion, participation proportion, completion proportion).                    | No                 | No                | Yes                  |
| Provide characteristics of study participants, as well as information on potential confounders and assessed outcomes.                                                                                                           | Unclear            | Unclear           | Unclear              |
| Give unadjusted estimates and, if applicable, confounder-adjusted estimates along with 95% confidence intervals and p-values.                                                                                                   | Yes                | No                | No                   |
| For multivariable analysis, provide information on the model building process, model fit statistics, and model assumptions (as appropriate).                                                                                    | NA                 | NA                | NA                   |
| Provide details about any sensitivity analysis performed. If there are considerable amount of missing data, report sensitivity analyses comparing the results of complete cases with that of the imputed dataset (if possible). | NA                 | NA                | NA                   |
| <b>Discussion</b>                                                                                                                                                                                                               |                    |                   |                      |
| Discuss the limitations of the study, considering sources of potential biases and imprecisions, such as non-representativeness of sample, study design, important uncontrolled confounders.                                     | No                 | Yes               | Yes                  |
| Give a cautious overall interpretation of results, based on potential biases and imprecisions and suggest areas for future research.                                                                                            | Yes                | Yes               | Yes                  |
| Discuss the external validity of the results.                                                                                                                                                                                   | Unclear            | Yes               | Yes                  |
| <b>Other</b>                                                                                                                                                                                                                    |                    |                   |                      |
| State whether any funding organization has had any roles in the survey's design, implementation, and analysis.                                                                                                                  | No                 | Yes               | Yes                  |
| Declare any potential conflict of interest.                                                                                                                                                                                     | Yes                | Yes               | Yes                  |
| Provide names of organizations/persons that are acknowledged along with their contribution to the research.                                                                                                                     | NA                 | Yes               | Yes                  |

**Appendix S6** Quality assessment of observational studies using the Strengthening the Reporting of Observational Studies in Epidemiology (STROBE) checklist

| <b>STROBE checklist for observational studies</b> | <b>Kolasa, 2001</b> | <b>Soeters, 2019</b> | <b>Suarez, 2016</b> | <b>Wahjuhono, 2014</b> |
|---------------------------------------------------|---------------------|----------------------|---------------------|------------------------|
| <b>Title and abstract</b>                         |                     |                      |                     |                        |



| <b>STROBE checklist for observational studies</b>                                                                                                                                                                                                                                                                                                                                                                                              | <b>Kolasa, 2001</b> | <b>Soeters, 2019</b> | <b>Suarez, 2016</b> | <b>Wahjuhono, 2014</b> |
|------------------------------------------------------------------------------------------------------------------------------------------------------------------------------------------------------------------------------------------------------------------------------------------------------------------------------------------------------------------------------------------------------------------------------------------------|---------------------|----------------------|---------------------|------------------------|
| (a) Indicate the study's design with a commonly used term in the title or the abstract                                                                                                                                                                                                                                                                                                                                                         | No                  | No                   | Yes                 | No                     |
| (b) Provide in the abstract an informative and balanced summary of what was done and what was found                                                                                                                                                                                                                                                                                                                                            | Yes                 | Yes                  | Yes                 | Unclear                |
| <b>Introduction</b>                                                                                                                                                                                                                                                                                                                                                                                                                            |                     |                      |                     |                        |
| Explain the scientific background and rationale for the investigation being reported                                                                                                                                                                                                                                                                                                                                                           | Yes                 | Yes                  | Yes                 | Yes                    |
| State specific objectives, including any prespecified hypotheses                                                                                                                                                                                                                                                                                                                                                                               | Yes                 | Yes                  | Yes                 | Yes                    |
| <b>Methods</b>                                                                                                                                                                                                                                                                                                                                                                                                                                 |                     |                      |                     |                        |
| Present key elements of study design early in the paper                                                                                                                                                                                                                                                                                                                                                                                        | Yes                 | Yes                  | Yes                 | Yes                    |
| Describe the setting, locations, and relevant dates, including periods of recruitment, exposure, follow-up, and data collection                                                                                                                                                                                                                                                                                                                | Yes                 | Yes                  | Yes                 | Yes                    |
| (a) Cohort study—Give the eligibility criteria, and the sources and methods of selection of participants. Describe methods of follow-up<br>Case-control study—Give the eligibility criteria, and the sources and methods of case ascertainment and control selection. Give the rationale for the choice of cases and controls<br>Cross-sectional study—Give the eligibility criteria, and the sources and methods of selection of participants | Yes                 | Yes                  | Unclear             | Yes                    |
| (b) Cohort study—For matched studies, give matching criteria and number of exposed and unexposed<br>Case-control study—For matched studies, give matching criteria and the number of controls per case                                                                                                                                                                                                                                         | NA                  | NA                   | NA                  | NA                     |
| Clearly define all outcomes, exposures, predictors, potential confounders, and effect modifiers. Give diagnostic criteria, if applicable                                                                                                                                                                                                                                                                                                       | Unclear             | Unclear              | Yes                 | Yes                    |
| For each variable of interest, give sources of data and details of methods of assessment (measurement). Describe comparability of assessment methods if there is more than one group                                                                                                                                                                                                                                                           | Yes                 | Yes                  | Yes                 | Yes                    |

| <b>STROBE checklist for observational studies</b>                                                                                                                                                                                                                             | <b>Kolasa, 2001</b> | <b>Soeters, 2019</b> | <b>Suarez, 2016</b> | <b>Wahjuhono, 2014</b> |
|-------------------------------------------------------------------------------------------------------------------------------------------------------------------------------------------------------------------------------------------------------------------------------|---------------------|----------------------|---------------------|------------------------|
| Describe any efforts to address potential sources of bias                                                                                                                                                                                                                     | No                  | No                   | No                  | No                     |
| Explain how the study size was arrived at                                                                                                                                                                                                                                     | Yes                 | No                   | No                  | No                     |
| Explain how quantitative variables were handled in the analyses. If applicable, describe which groupings were chosen and why                                                                                                                                                  | Unclear             | No                   | Yes                 | Yes                    |
| (a) Describe all statistical methods, including those used to control for confounding                                                                                                                                                                                         | Unclear             | Yes                  | Yes                 | No                     |
| (b) Describe any methods used to examine subgroups and interactions                                                                                                                                                                                                           | Unclear             | Yes                  | Yes                 | No                     |
| (c) Explain how missing data were addressed                                                                                                                                                                                                                                   | No                  | Yes                  | No                  | No                     |
| (d) Cohort study—If applicable, explain how loss to follow-up was addressed; Case-control study—If applicable, explain how matching of cases and controls was addressed; Cross-sectional study—If applicable, describe analytical methods taking account of sampling strategy | Yes                 | NA                   | NA                  | Yes                    |
| (e) Describe any sensitivity analyses                                                                                                                                                                                                                                         | NA                  | Yes                  | Yes                 | No                     |
| <b>Results</b>                                                                                                                                                                                                                                                                |                     |                      |                     |                        |
| (a) Report numbers of individuals at each stage of study—eg numbers potentially eligible, examined for eligibility, confirmed eligible, included in the study, completing follow-up, and analysed                                                                             | Yes                 | Yes                  | NA                  | Yes                    |
| b) Give reasons for non-participation at each stage                                                                                                                                                                                                                           | Unclear             | Yes                  | NA                  | Unclear                |
| c) Consider use of a flow diagram                                                                                                                                                                                                                                             | No                  | No                   | No                  | No                     |
| a) Give characteristics of study participants (eg demographic, clinical, social) and information on exposures and potential confounders                                                                                                                                       | No                  | Unclear              | Unclear             | Unclear                |
| (b) Indicate number of participants with missing data for each variable of interest                                                                                                                                                                                           | Yes                 | Yes                  | NA?                 | No                     |
| (c) Cohort study—Summarise follow-up time (eg, average and total amount)                                                                                                                                                                                                      | Yes                 | Yes                  | NA                  | Yes                    |
| Cohort study—Report numbers of outcome events or summary measures over time; Case-control study—Report numbers in each exposure category, or summary measures of exposure; Cross-sectional study—Report numbers of outcome events or summary measures                         | Yes                 | Yes                  | Yes                 | Yes                    |
| (a) Give unadjusted estimates and, if applicable, confounder-adjusted estimates and their precision (eg, 95% confidence interval). Make clear which confounders                                                                                                               | Unclear             | Yes                  | Yes                 | Unclear                |

| <b>STROBE checklist for observational studies</b>                                                                                                                          | <b>Kolasa, 2001</b> | <b>Soeters, 2019</b> | <b>Suarez, 2016</b> | <b>Wahjuhono, 2014</b> |
|----------------------------------------------------------------------------------------------------------------------------------------------------------------------------|---------------------|----------------------|---------------------|------------------------|
| were adjusted for and why they were included                                                                                                                               |                     |                      |                     |                        |
| (b) Report category boundaries when continuous variables were categorized                                                                                                  | NA                  | NA                   | NA                  | NA                     |
| (c) If relevant, consider translating estimates of relative risk into absolute risk for a meaningful time period                                                           | NA                  | Yes                  | NA                  | NA                     |
| Report other analyses done—eg analyses of subgroups and interactions, and sensitivity analyses                                                                             | NA                  | Yes                  | Yes                 | NA                     |
| <b>Discussion</b>                                                                                                                                                          |                     |                      |                     |                        |
| Summarise key results with reference to study objectives                                                                                                                   | Yes                 | Yes                  | Yes                 | Yes                    |
| Discuss limitations of the study, taking into account sources of potential bias or imprecision.<br>Discuss both direction and magnitude of any potential bias              | Unclear             | Yes                  | Yes                 | Unclear                |
| Give a cautious overall interpretation of results considering objectives, limitations, multiplicity of analyses, results from similar studies, and other relevant evidence | Yes                 | Yes                  | Yes                 | Yes                    |
| Discuss the generalisability (external validity) of the study results                                                                                                      | Yes                 | Yes                  | Yes                 | Yes                    |
| <b>Other</b>                                                                                                                                                               |                     |                      |                     |                        |
| Give the source of funding and the role of the funders for the present study and, if applicable, for the original study on which the present article is based              | No                  | Unclear              | Unclear             | Unclear                |

**Appendix S7** Quality assessment of observational studies using Risk Of Bias In Non-randomized Studies - of Exposure (ROBINS-E)

|                                                  | Kolasa, 2001  | Wahjuhono, 2014 | Suarez, 2016 | Soeters, 2019 |
|--------------------------------------------------|---------------|-----------------|--------------|---------------|
| Bias due to confounding                          | High          | Low             | Low          | Low           |
| Bias arising from measurement of the exposure    | Low           | Low             | Low          | Low           |
| Bias in selection of participants into the study | Some concerns | Low             | Low          | Low           |
| Bias due to post-exposure interventions          | Low           | Low             | Low          | Low           |
| Bias due to missing data                         | Some concerns | Some concerns   | High         | Low           |
| Bias arising from measurement of outcomes        | Low           | Low             | Low          | Low           |
| Bias in selection of the reported result         | High          | Low             | Low          | Low           |
| Overall risk-of-bias rating                      | High          | Some concerns   | High         | Low           |
